# Supplementary material
Source: Springer Nature journal article supplement (https://www.springermedizin.de/resource/supplementary/12888_2013_1428_MOESM4_ESM.pdf/9480192)

- *d*-MPH-ER 20 mg/day
- ▲— *d*-MPH-ER 30 mg/day
- -▼- - *d,l*-MPH-ER 36 mg/day
- ◆— *d,l*-MPH-ER 54 mg/day
- Placebo

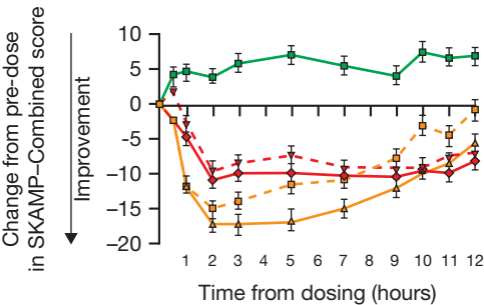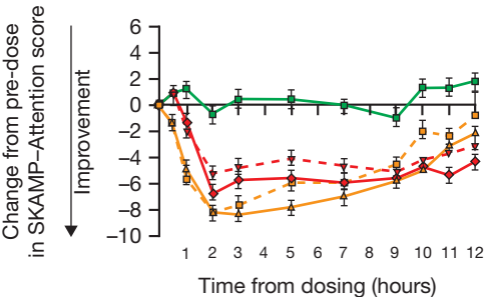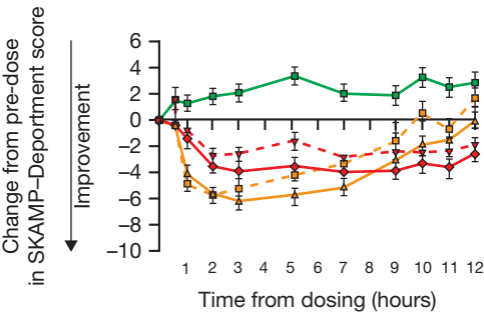

Supplement: MOESM4 [file 9480192]
